# Supplementary material
Source: PubMed Central journal article supplement (PMC3352173)
Supplement: supp_157.9.2604_mic050658_suppl_figs_S1-S6.pdf [file supp_157.9.2604_mic050658_suppl_figs_S1-S6.pdf]

**Stock culture heterogeneity rather than new mutational variation complicates short-term cell physiology studies of *Escherichia coli* K-12 MG1655 in continuous culture**

**By:** Ranno Nahku, Karl Peebo, Kaspar Valgepea, Jeffrey E. Barrick, Kaarel Adamberg and Raivo Vilu

**SUPPLEMENTARY FIGURES**

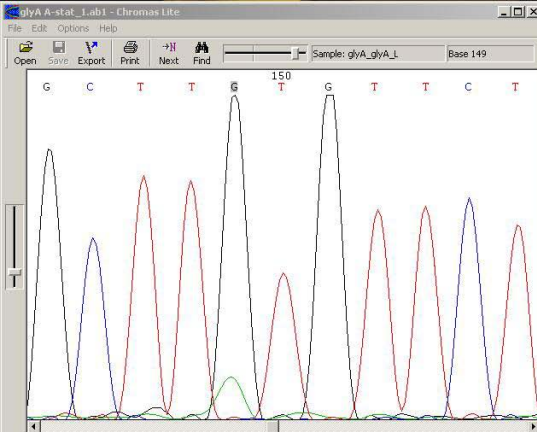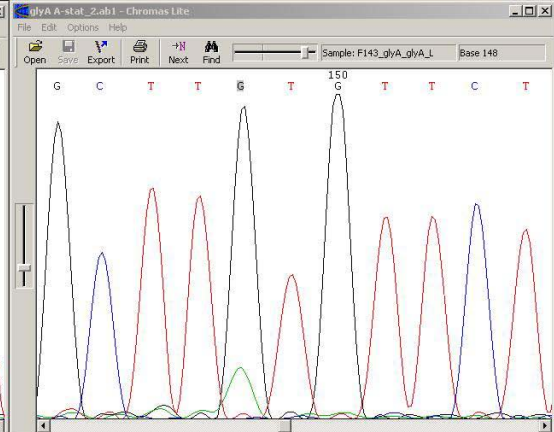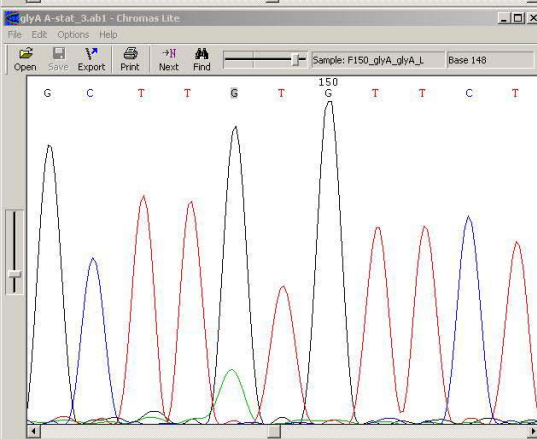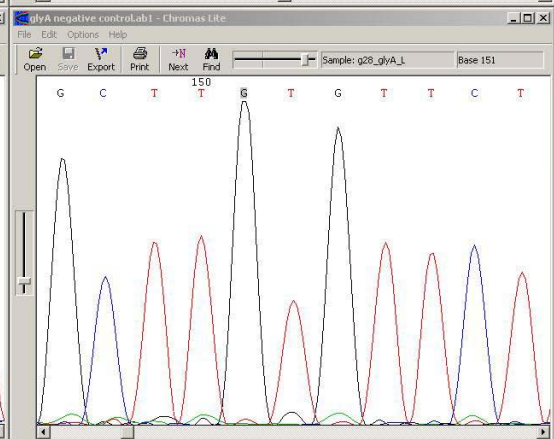

Supplementary Fig. S1

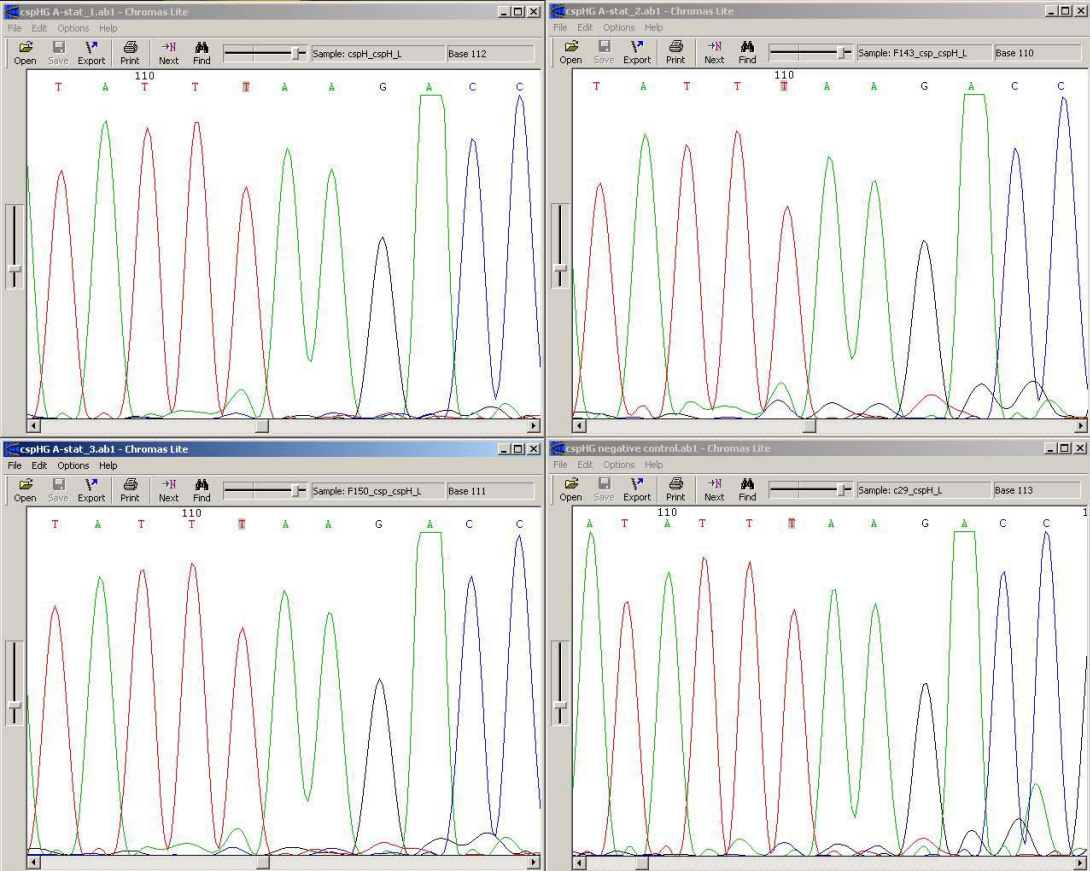

Supplementary Fig. S2

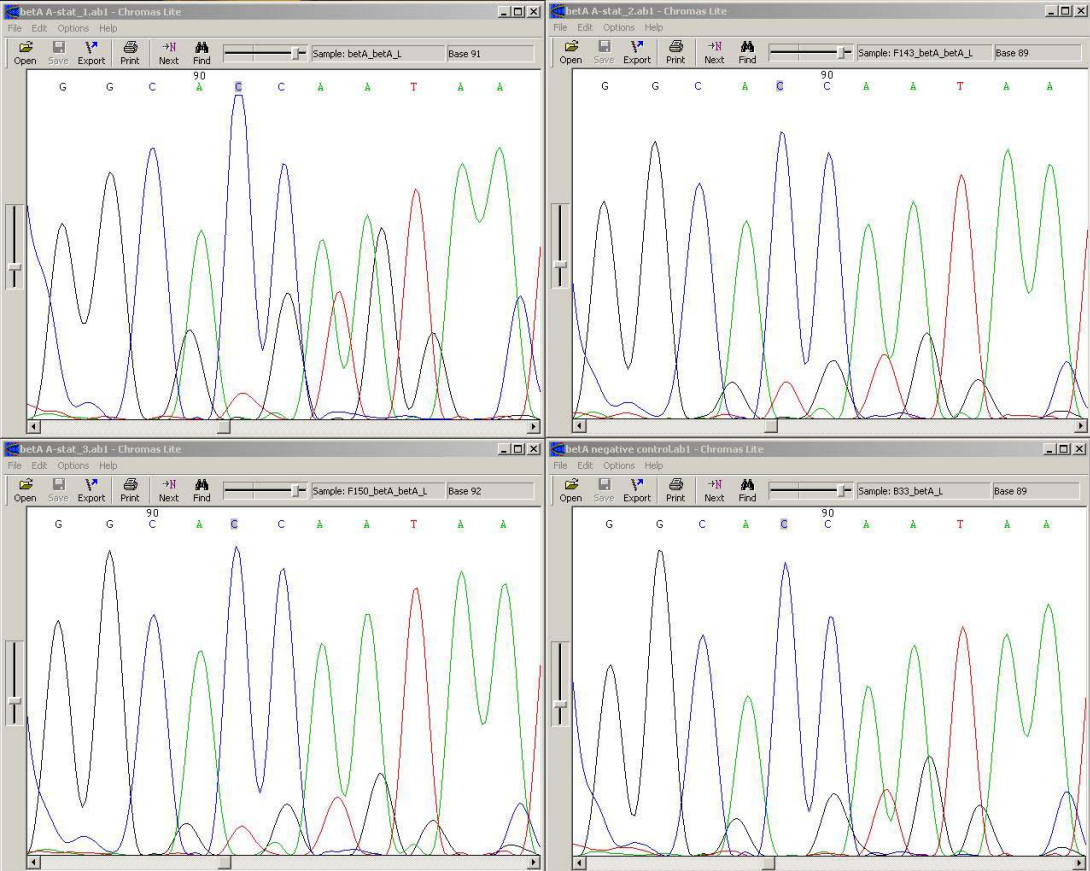

**Supplementary Fig. S3**

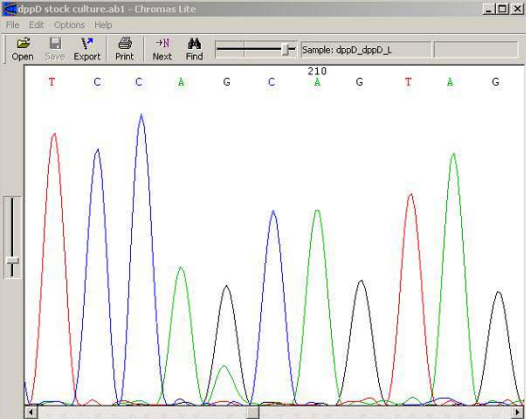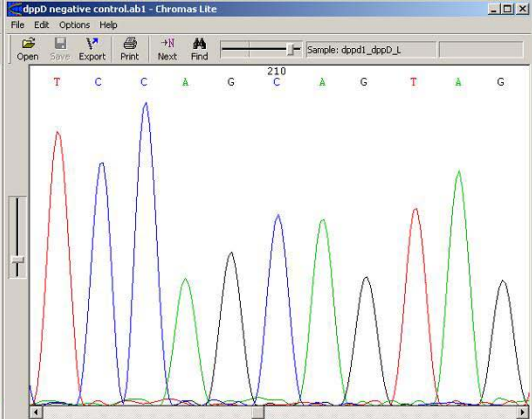

**Supplementary Fig. S4**

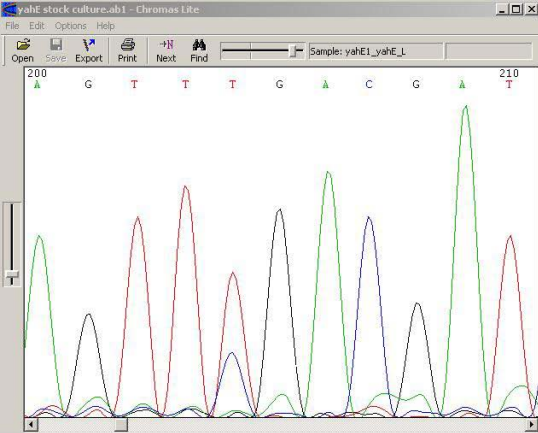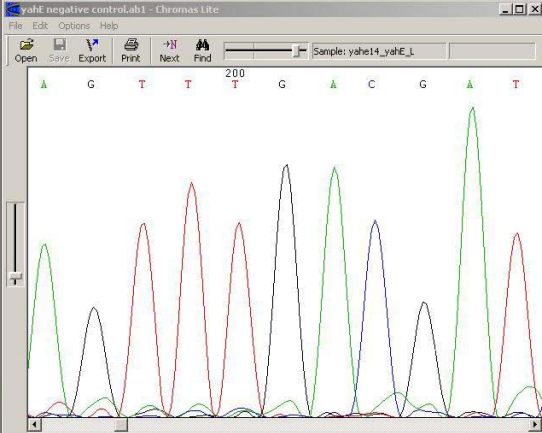

**Supplementary Fig. S5**

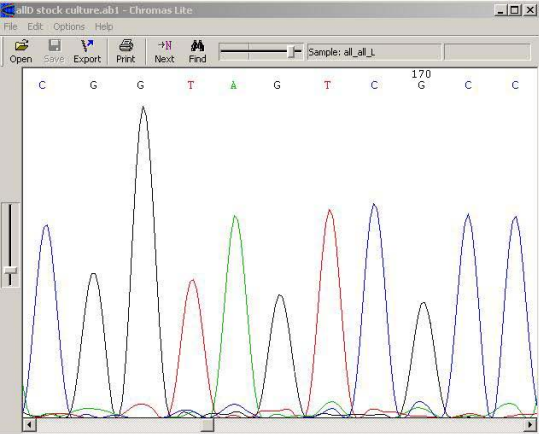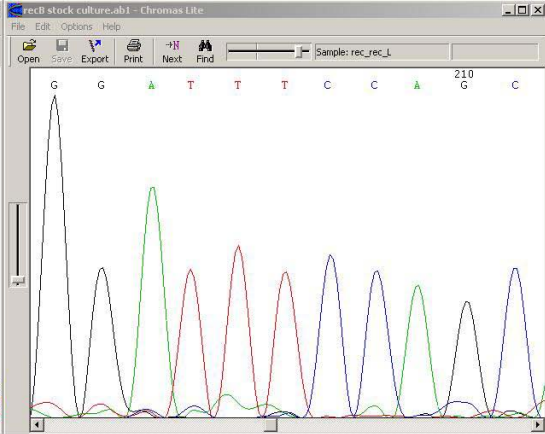

**Supplementary Fig. S6**
