# Supplementary material
Source: PubMed Central journal article supplement (PMC3352173)
Supplement: supp_157.9.2604_mic050658_supplementary_tables_S1_and_S2.pdf [file supp_157.9.2604_mic050658_supplementary_tables_S1_and_S2.pdf]

**Stock culture heterogeneity rather than new mutational variation complicates short-term cell physiology studies of *Escherichia coli* K-12 MG1655 in continuous culture**

**By:** Ranno Nahku, Karl Peebo, Kaspar Valgepea, Jeffrey E. Barrick, Kaarel Adamberg and Raivo Vilu

**SUPPLEMENTARY TABLES**

### Supplementary Table S1. Predicted and validated subpopulations in the A-stat experiment

Top *breseq* predictions of base substitution and single-base indel polymorphisms in the sequenced populations are listed. Positions where a polymorphism with a significant score that passed bias tests was detected in any of the three samples are shown with statistics for all three samples. The methods behind these predictions are described in the *breseq* (1.00rc7) documentation (<http://barricklab.org/twiki/bin/view/Lab/ToolsBacterialGenomeResequencing>). Predictions are shaded based on whether they passed two specific test criteria: (1)  $-\log_{10}$  E value score  $\geq 4.0$  for the likelihood ratio test of a mixed-base model (that there was a true subpopulation with the variant base) versus a single-base model (that discrepancies from the reference were sequencing errors), and (2)  $P$  value  $< 0.05$  for Fisher's exact test for bias in the strands of reads supporting the variant subpopulation versus the reference sequence. Green passed both tests, blue failed just the polymorphism test, red failed just the strand bias test, and no variant bases were observed for grey text. Overall scores were calculated as sums of the scores for predictions across all samples. Columns: ?, results of experimentally testing specific predictions, validated as detailed in the main text and supplement ( $\checkmark$ ), not detected by Sanger sequencing of the mixed-population sample and therefore likely spurious (X) or not experimentally tested because of low Mut % and Overall score (NT); Position, in the reference genome sequence; Mut, change in sequence from reference genome; Overall score, as explained above; Mut %, maximum-likelihood predicted frequency of subpopulation with mutation; Score,  $-\log_{10}$  E value for polymorphism test; Q30 Mut, number of bases with Phred quality scores  $\geq 30$  supporting the new subpopulation in reads on the top/bottom genome strand; Q30 Ref, number of bases with Phred quality scores  $\geq 30$  supporting the reference base in reads on the top/bottom genome strand; Annotation, amino acid and codon changes for base substitution mutations in genes, location of mutations in reading frame for indels, or distance to the two neighbouring genes for intergenic predictions with  $-/+$  for orientation upstream or downstream of those genes, respectively; Gene, gene containing mutation or two neighbouring genes separated by a solidus (/); Description, description of gene containing mutation or two neighbouring genes separated by a solidus.

| ?  | Position | Mut   | Overall score | Stock (0 gen) |       |         |         | Dilution rate (D)=0.11 h <sup>-1</sup> (18 gen) |       |         |         | Dilution rate (D)=0.48 h <sup>-1</sup> (34 gen) |       |         |         | Annotation             | Gene             | Description                                                                            |
|----|----------|-------|---------------|---------------|-------|---------|---------|-------------------------------------------------|-------|---------|---------|-------------------------------------------------|-------|---------|---------|------------------------|------------------|----------------------------------------------------------------------------------------|
|    |          |       |               | Mut %         | Score | Q30 Mut | Q30 Ref | Mut %                                           | Score | Q30 Mut | Q30 Ref | Mut %                                           | Score | Q30 Mut | Q30 Ref |                        |                  |                                                                                        |
| √  | 335361   | T→C   | 79.6          | 8.1%          | 12.5  | 3/3     | 44/24   | 9.5%                                            | 45.3  | 9/7     | 98/55   | 7.0%                                            | 21.8  | 6/3     | 91/28   | Coding F71F (TTI→TTQ)  | <i>yahE</i>      | Predicted protein                                                                      |
| √  | 1050465  | T→A   | 65.8          | 2.9%          | 3.9   | 2/1     | 61/39   | 4.4%                                            | 24.8  | 9/0     | 129/68  | 10.7%                                           | 37.1  | 6/6     | 64/36   | Intergenic (-67/-219)  | <i>cspH/cspG</i> | Stress protein/DNA-binding transcriptional regulator                                   |
| √  | 3701283  | G→A   | 40.8          | 17.0%         | 19.4  | 6/2     | 27/12   | 10.3%                                           | 15.4  | 4/3     | 44/17   | 7.8%                                            | 6.0   | 1/3     | 29/18   | Coding L197L (CTG→TTG) | <i>dppD</i>      | Dipeptide transporter                                                                  |
| √  | 2683035  | G→A   | 30.2          | –             | –     | 0/0     | 19/12   | 9.2%                                            | 15.2  | 4/3     | 34/35   | 14.9%                                           | 15.0  | 4/3     | 19/21   | Coding H165H (CAQ→CAI) | <i>glyA</i>      | Serine hydroxymethyltransferase                                                        |
| √  | 326446   | C→T   | 28.8          | 2.3%          | –     | 0/1     | 13/29   | 5.7%                                            | 16.5  | 1/7     | 33/108  | 9.7%                                            | 12.3  | 4/2     | 14/42   | Coding G9D (GGT→GAT)   | <i>betA</i>      | Choline dehydrogenase                                                                  |
| NT | 3410579  | T→A   | 26.5          | 4.4%          | 6.6   | 2/2     | 62/25   | 1.5%                                            | 3.1   | 2/1     | 110/86  | 4.2%                                            | 16.8  | 2/5     | 86/74   | Intergenic (+20/-64)   | <i>yhdJ/yhdU</i> | Predicted methyltransferase/predicted membrane protein                                 |
| NT | 3237537  | T→G   | 23.1          | 2.9%          | 1.0   | 1/1     | 21/45   | 4.1%                                            | 21.0  | 6/1     | 79/86   | 1.7%                                            | 1.1   | 2/0     | 52/65   | Coding N312K (AAT→AAG) | <i>alx</i>       | Predicted inner membrane protein                                                       |
| X  | 2952301  | T→G   | 5.9           | 7.9%          | 5.9   | 2/1     | 9/26    | –                                               | –     | 0/0     | 39/52   | 1.5%                                            | –     | 0/1     | 24/33   | Coding E575D (GAA→GAC) | <i>recB</i>      | Exonuclease V, beta subunit                                                            |
| NT | 3590376  | C→T   | 5.6           | 1.3%          | –     | 0/2     | 76/71   | 2.3%                                            | 5.6   | 2/3     | 84/127  | 1.1%                                            | –     | 1/1     | 88/99   | Intergenic (-28/+371)  | <i>ugpB/livF</i> | Glycerol-3-phosphate transporter subunit/branched-chain amino acid transporter subunit |
| NT | 432228   | Δ1 bp | 5.5           | –             | –     | 0/0     | 33/38   | 0.9%                                            | –     | 0/1     | 63/48   | 4.1%                                            | 5.5   | 1/2     | 25/45   | Coding (3/450 nt)      | <i>nrdR</i>      | Conserved protein                                                                      |
| NT | 3701921  | G→A   | 4.8           | 6.1%          | 4.8   | 1/3     | 43/18   | –                                               | –     | 0/0     | 65/30   | –                                               | –     | 0/0     | 38/22   | Coding *288C (TGA→TGI) | <i>dppC</i>      | Dipeptide transporter                                                                  |
| X  | 545057   | A→G   | 4.4           | 6.5%          | 2.5   | 1/2     | 22/21   | 7.1%                                            | 1.9   | 0/3     | 16/23   | 3.6%                                            | –     | 0/1     | 10/17   | Coding T177T (ACT→ACC) | <i>allD</i>      | Ureidoglycolate dehydrogenase                                                          |
| NT | 1962621  | C→A   | 4.2           | –             | –     | 0/0     | 16/26   | 4.6%                                            | 4.2   | 1/3     | 38/45   | –                                               | –     | 0/0     | 19/29   | Coding G152W (GGG→TGG) | <i>flhA</i>      | Predicted flagellar export pore protein                                                |

**Supplementary Table S2.** PCR primers used in HT DNA sequencing data validation

| Genome position of mutation* | Mutation      | Related gene(s)† | Left primer          | Right primer           | Product length (bp) | Product length in case of insertion/deletion (bp) | Annealing temperature (°C) |
|------------------------------|---------------|------------------|----------------------|------------------------|---------------------|---------------------------------------------------|----------------------------|
| 326446                       | C→T           | <i>betA</i>      | CATCTGGGTGCGGAAGTC   | GCTACAAACACTCCGGCATT   | 264                 |                                                   | 54                         |
| 335361                       | T→C           | <i>yahE</i>      | CAGAAAGACGGTGTGTGTGG | CTGAATAACTGCCCGTCGTT   | 470                 |                                                   | 60                         |
| 547694                       | A→G           | <i>ylbE_1</i>    | GCAATAAGGGGTTCCCATGT | GCATCACTTTGCCGATACCT   | 421                 |                                                   | 55                         |
| 547835                       | +G            | <i>ylbE_1</i>    |                      |                        |                     |                                                   |                            |
| 1050465                      | T→A           | <i>cspH/cspG</i> | CGGAGGGGATAATGAATCCT | GGGGATAATGCCTGATAATGA  | 272                 |                                                   | 54                         |
| 2683035                      | G→A           | <i>glyA</i>      | AACAACGTGAGCATGAGGAA | ACCAGGTGATACCGTTCTGG   | 337                 |                                                   | 54                         |
| 3422257                      | ATC→CAT       | <i>rrlD</i>      | ATGACAACCCGAACACCAGT | TCGCTCAACGGATAAAAAGGT  | 283                 |                                                   | 55                         |
| 3701283                      | G→A           | <i>dppD</i>      | GGAACGACACCTGGCAAC   | AGCGATTAAGGTGCATCAGG   | 483                 |                                                   | 60                         |
| 3957957                      | C→T           | <i>ppiC/yifN</i> | ATATGCAGTGCTGCTGCTGT | ACATACAGAGGGCGGTCATC   | 280                 |                                                   | 55                         |
| 1976527–1977302              | IS1 deletion  | <i>flhD/uspC</i> | TCGACGCAACTGTACTCGTC | GCAACATCCCATTTCGATTA   | 988                 | 213                                               | 50                         |
| 1977510–1977513              | IS5 insertion | <i>flhD/uspC</i> | CGCTAGCAAGCAAAAATGAA | CCCGGTGATCATATAATTTCAA | 286                 | 1481                                              | 54                         |
| 4294305–4294415              | Δ111 bp       | <i>gliP/yjcO</i> | TGGCTTATGAGCGTGAAGTG | CACTGGTTGAACCTGAGCTG   | 769                 | 658                                               | 54                         |
| 4294291                      | T→C           | <i>gliP/yjcO</i> |                      |                        |                     |                                                   |                            |
| 152081–152084                | IS5 insertion | <i>yadL</i>      | GGCGACAGCACTTGCTTTAT | GTTGCGCTACGTGAAACAGA   | 482                 | 1677                                              | 55                         |
| 545057                       | A→G           | <i>allD</i>      | CCGAGTAAGACGCTGAGAG  | GCAATTTTACATGCCGACAA   | 494                 |                                                   | 54                         |
| 2952301                      | T→G           | <i>recB</i>      | CCAGATTTGCCGATAACCAT | TGAAAATGTGGCTGATGGAA   | 461                 |                                                   | 54                         |

\*Positions of IS5 insertions give the target site nucleotides that were duplicated upon insertion of the new IS copy. Both new IS5 copies inserted in the forward (+) orientation in the genome.

†*Gene1/Gene2* indicates that the mutation was in the intergenic region.
